# Supplementary material for: Exploring the trade-off between quality and fairness in human partner choice
Source: PubMed Central journal article supplement (PMC5180136; doi:10.1098/rsos.160510), 2016-11-09
Supplement: rsos160510supp2.pdf [file rsos160510supp2.pdf]

**Table S1. Chooser predictions about others' preferences. From 'Exploring the trade-off between quality and fairness in human partner choice'.**

| Scenario                      | Wealth (N)  | Predict<br>other<br>prefer<br>rich | Predict<br>others<br>prefer<br>poor | Predict<br>others show<br>no preference | Unsure who<br>others would<br>prefer |
|-------------------------------|-------------|------------------------------------|-------------------------------------|-----------------------------------------|--------------------------------------|
| 1. Rich-Fair vs Poor-Fair     | Stable (47) | 39                                 | 4                                   | 3                                       | 1                                    |
|                               | Change (48) | 22                                 | 4                                   | 14                                      | 8                                    |
| 2. Rich-Stingy vs Poor-Stingy | Stable (50) | 43                                 | 5                                   | 0                                       | 2                                    |
|                               | Change (49) | 28                                 | 6                                   | 10                                      | 5                                    |
| 3. Rich-Fair vs Poor-Stingy   | Stable (49) | 48                                 | 1                                   | 0                                       | 0                                    |
|                               | Change (48) | 47                                 | 1                                   | 0                                       | 0                                    |
| 4. Rich-Stingy vs Poor-Fair   | Stable (99) | 53                                 | 32                                  | 3                                       | 11                                   |
|                               | Change (99) | 20                                 | 66                                  | 5                                       | 8                                    |

We asked whether chooser's preferences aligned with how they thought others would behave, specifically when choosing between rich-stingy and poor-fair partners. Indeed, choosers' own preferences did not always align with what they thought the normative response was (Table S1). Under unstable wealth, 12/85 (14.1 %) choosers preferred the rich-stingy partner, and 20/86 (23.2 %) thought others would make the same choice (Chi-squared test:  $\chi^2 = 1.78$ ,  $df = 1$ ,  $p = 0.18$ ,  $\alpha = 0.01$ ). However, when wealth was stable, 37/86 (43.0 %) choosers preferred the rich-stingy partner but thought 53/85 (62.4 %) others would have this preference (Chi-squared test:  $\chi^2 = 5.65$ ,  $df = 1$ ,  $p = 0.02$ ,  $\alpha = 0.01$ ). Note that this discrepancy between choosers' own preferences and how they thought others would behave was not significant under the corrected  $\alpha$  level.
